# Supplementary material for: Surfactant-free fabrication of porous PdSn alloy networks by self-assembly as superior freestanding electrocatalysts for formic acid oxidation
Source: Royal Society of Chemistry journal article supplement (doi:10.1039/c9nj04931b), 2019-01-01
Supplement: c9nj04931b1.pdf [file c9nj04931b1.pdf]

# Surfactant-free fabrication of porous PdSn alloy networks by self-assembly as superior freestanding electrocatalysts for formic acid oxidation

Qian Qin,<sup>a</sup> Jian Xie,<sup>a</sup> Qizhi Dong,<sup>\*a</sup> Gang Yu,<sup>a</sup> Hong Chen<sup>\*b</sup>

<sup>a</sup> State Key Laboratory of Chemo/Biosensing and Chemometrics, College of Chemistry and Chemical Engineering, Hunan University, Changsha 410082, PR China. E-mail: qzhdong67@163.com

<sup>b</sup> School of Materials Science and Energy Engineering, Foshan University, Guangdong, 528000, PR China. E-mail: chenhangcs@126.com

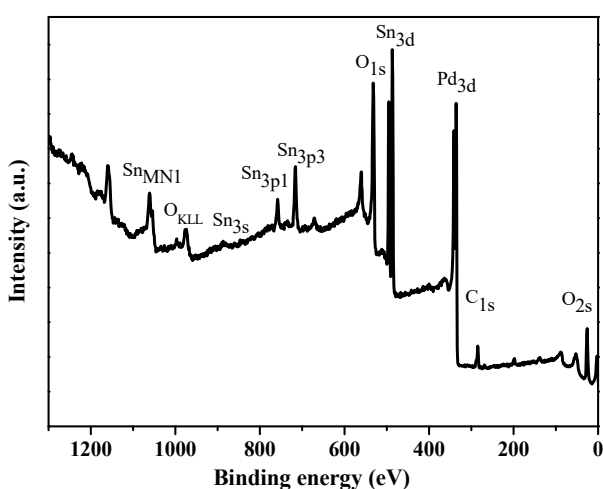

Fig. S1 XPS survey spectrum of the Pd<sub>2</sub>Sn<sub>1</sub> networks

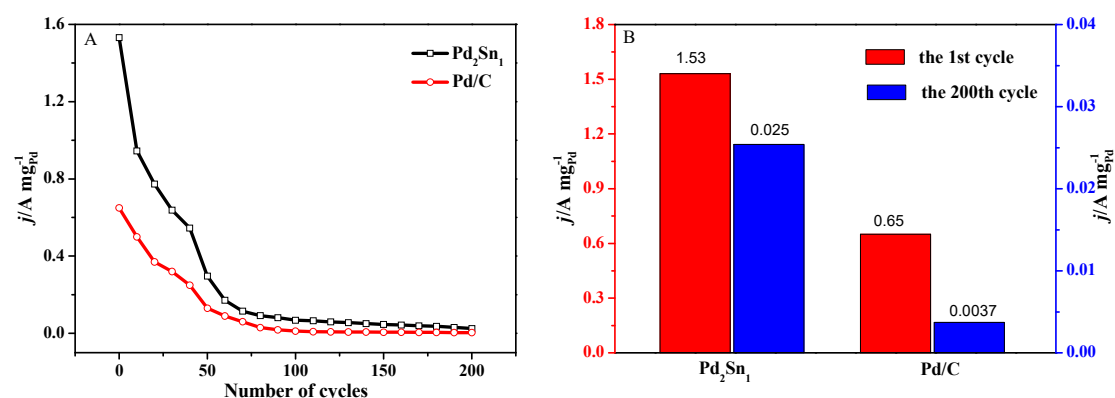

Fig. S2 A) The peak current density of extensive CVs versus cycle number and B) the peak current density of the first cycle and the 200th cycle of formic acid on Pd<sub>2</sub>Sn<sub>1</sub> networks and Pd/C in 0.5 M H<sub>2</sub>SO<sub>4</sub> and 0.5 M HCOOH at the scan rate of 50 mV s<sup>-1</sup>.

## References

- [S1] F. Zhu, G. Ma, Z. Bai, R. Hang, B. Tang, Z. Zhang and X. Wang, Journal of Power Sources, 2013, 242, 610-620.
